# Supplementary material for: Technical note: Isolating methane emissions from animal feeding operations in an interfering location
Source: Copernicus journal article supplement (doi:10.5194/egusphere-2022-968), 2022-11-14
Supplement: Supplementary file 1 [file egusphere-2022-968-supplement.pdf]

# Technical note: Isolating methane emissions from animal feeding operations in an interfering location

Megan E. McCabe<sup>1</sup>, Ilana B. Pollack<sup>2</sup>, Emily V. Fischer<sup>2</sup>, and Dana R. Caulton<sup>1</sup>

<sup>1</sup>Department of Atmospheric Science, University of Wyoming, Laramie, WY, 82071, USA

<sup>2</sup>Department of Atmospheric Science, Colorado State University, Fort Collins, Colorado, 80523, USA

**Correspondence:** Dana R. Caulton (dcaulton@uwyo.edu)

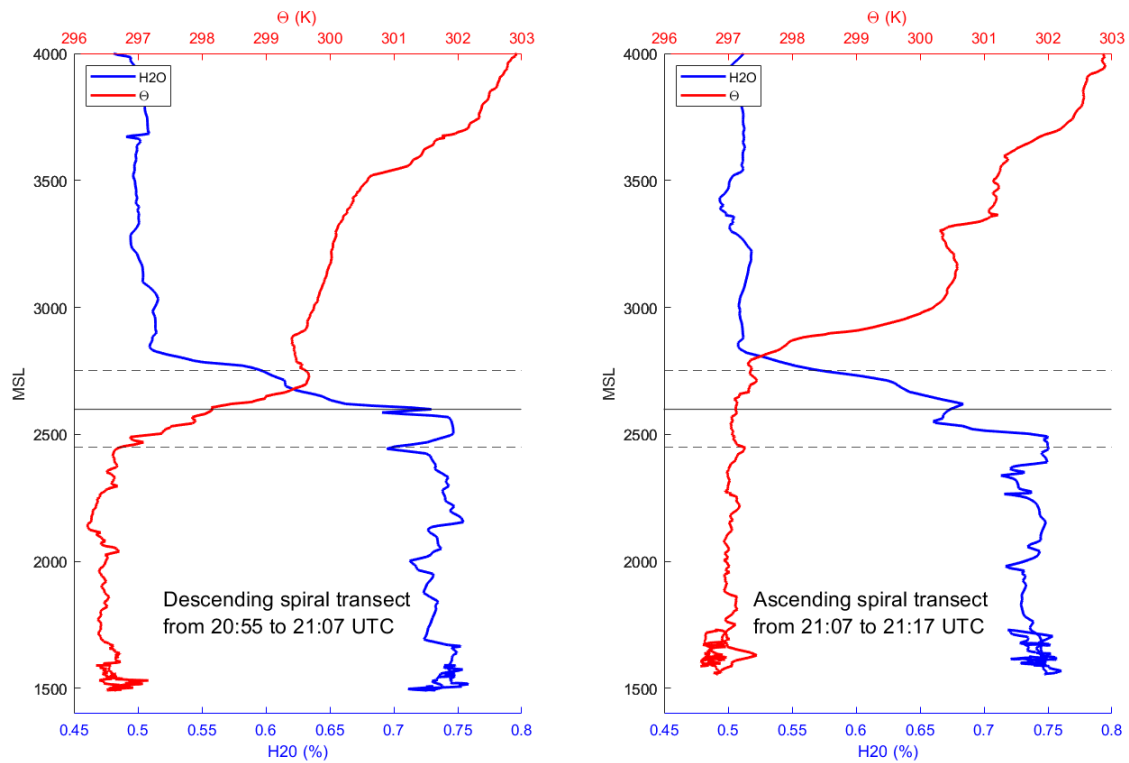

**Figure S1.** Descending spiral transect (left) followed by an ascending spiral (right) transect to show the MLB during flight 2 (F2) conducted on November 13, 2019. Potential temperature ( $\theta$ , red) and water vapor (H<sub>2</sub>O, blue) were used to determine the mixed MBL. The dotted line represents the selected MBL used in calculations.

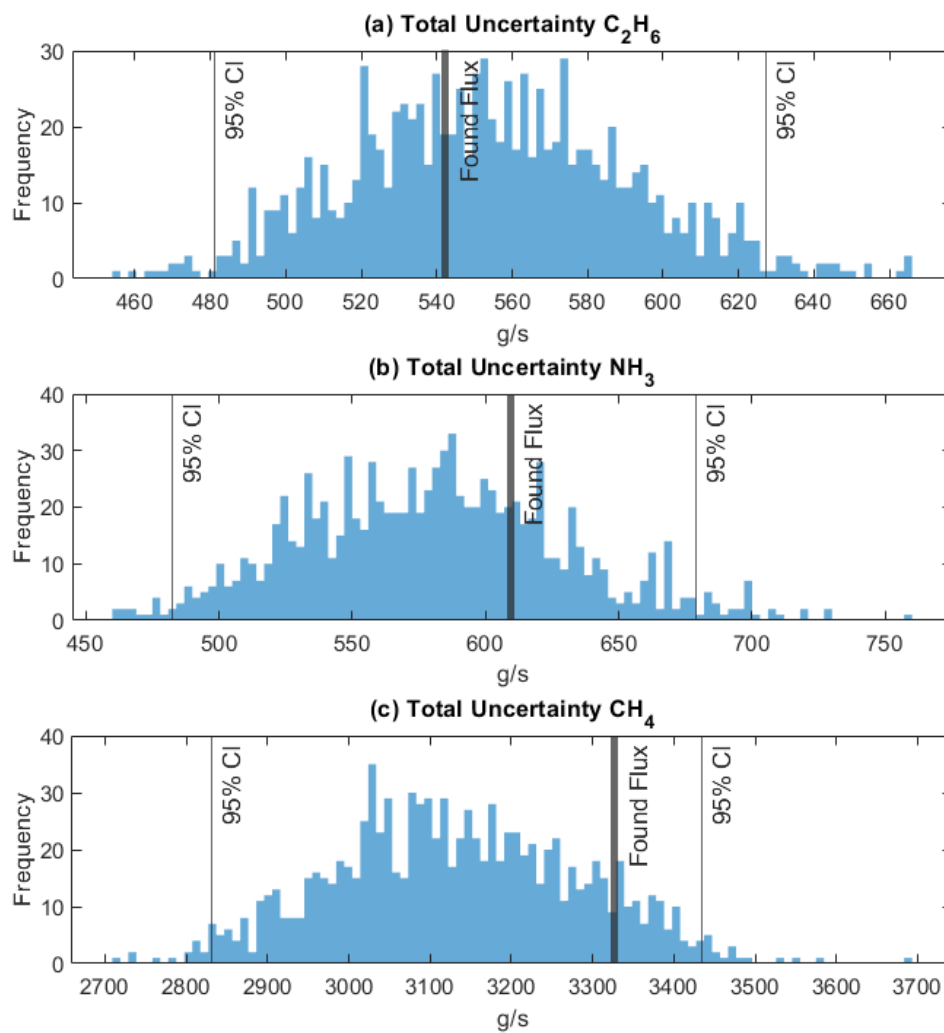

**Figure S2.** Total uncertainty based on Monte Carlo. (a) Total uncertainty  $C_2H_6$ . (b) Total uncertainty of  $NH_3$ . (c) Total uncertainty of total  $CH_4$ .

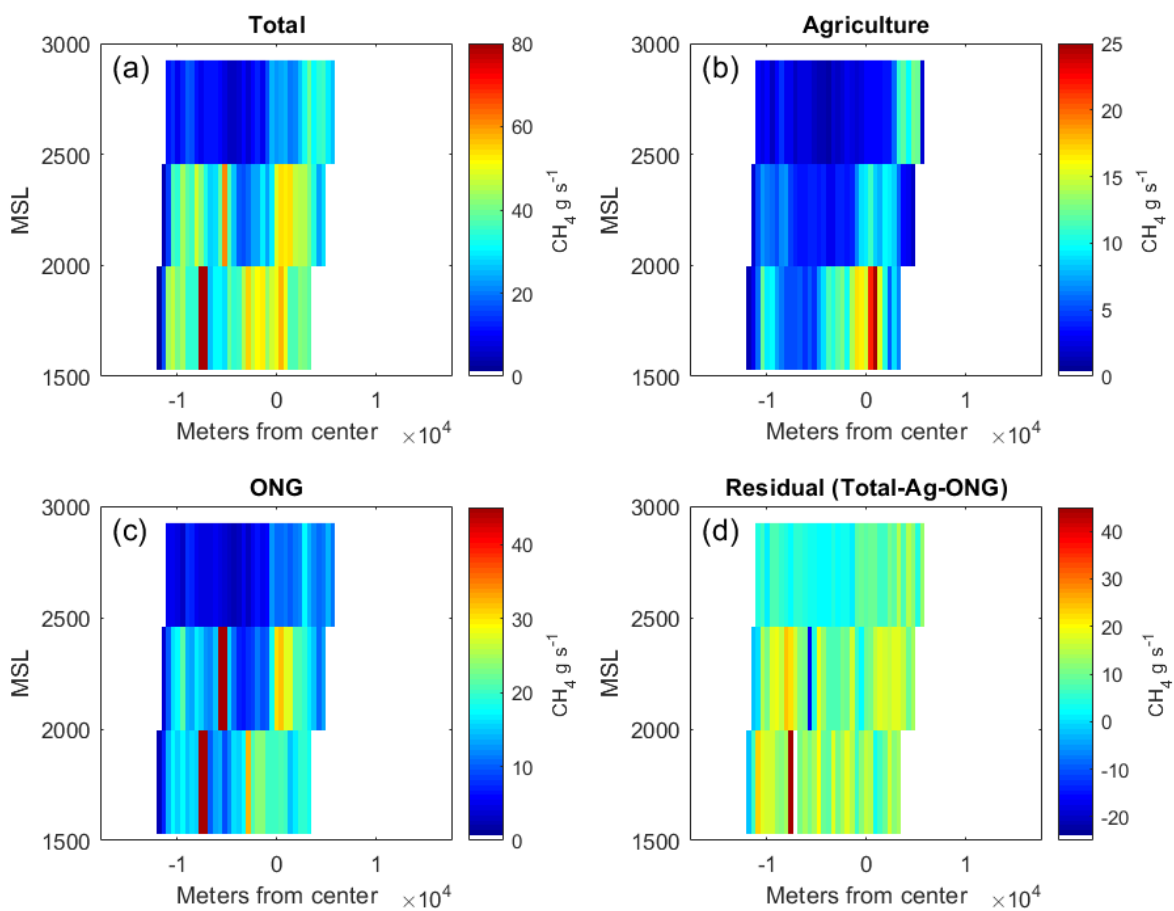

**Figure S3.** Curtain plots of  $\text{CH}_4$  emission by point. (a) Total emissions by point. (b) Agriculture emissions. (c) ONG emissions. (d) Any remaining emissions that are not accounted for in ONG and agriculture.

**Table S1.** Sensitivity of the MVR fit for Transect data.

| Transect MVR Approaches                                                                 | a                 | b           | c         | R <sup>2</sup> |
|-----------------------------------------------------------------------------------------|-------------------|-------------|-----------|----------------|
| Raw CH <sub>4</sub>                                                                     | 1933.2±0.6        | 1.090±0.072 | 5.73±0.10 | 0.74           |
| Background subtracted CH <sub>4</sub>                                                   | 0.6±0.6 (1933.2)  | 1.090±0.072 | 5.73±0.10 | 0.74           |
| Background subtracted C <sub>2</sub> H <sub>6</sub> & NH <sub>3</sub>                   | 1945.9±0.4        | 1.090±0.072 | 5.73±0.10 | 0.74           |
| Background subtracted CH <sub>4</sub> , C <sub>2</sub> H <sub>6</sub> & NH <sub>3</sub> | 13.3±0.4 (1945.9) | 1.090±0.072 | 5.73±0.10 | 0.74           |

Background subtracted CH<sub>4</sub> - 1932.6 (found from around the transects.)

**Table S2.** Sensitivity of the MVR fit for F2 data.

| F2 MVR Approaches                                                                       | a                 | b           | c           | R <sup>2</sup> |
|-----------------------------------------------------------------------------------------|-------------------|-------------|-------------|----------------|
| Raw CH <sub>4</sub>                                                                     | 1933.2±0.2        | 0.638±0.010 | 6.329±0.051 | 0.78           |
| Background subtracted CH <sub>4</sub>                                                   | 0.6±0.2 (1933.2)  | 0.638±0.010 | 6.329±0.051 | 0.78           |
| Background subtracted C <sub>2</sub> H <sub>6</sub> & NH <sub>3</sub>                   | 1945.2±0.2        | 0.638±0.010 | 6.329±0.051 | 0.78           |
| Background subtracted CH <sub>4</sub> , C <sub>2</sub> H <sub>6</sub> & NH <sub>3</sub> | 12.6±0.2 (1945.2) | 0.638±0.010 | 6.329±0.051 | 0.78           |

Background subtracted CH<sub>4</sub> - 1932.6 (found from around the transects).

**Table S3.** Attribution method fit statistics.

| Approach | Data            | a           | b           | c            | R <sup>2a</sup> | Average Residual | Normalized Sum of Residual <sup>2 b</sup> |
|----------|-----------------|-------------|-------------|--------------|-----------------|------------------|-------------------------------------------|
| SM       | F2 <sup>2</sup> | 1932.6 ± 33 | 1.2         | 9.1          | 0.20            | -14              | 3.02                                      |
| SM       | Transect        | 1932.6 ± 33 | 2.22        | 6.8          | 0.47            | -11              | 2.04                                      |
| MVR      | F2              | 1933.2±0.6  | 0.638±0.010 | 6.329±0.051  | 0.72            | -9               | 1.87                                      |
| MVR      | Transect        | 1933.2±0.2  | 1.090±0.072 | 5.729 ±0.095 | 0.74            | 1                | 1.0                                       |

<sup>a</sup> Calculated R<sup>2</sup> on the transect data at 1 Hz. <sup>b</sup> The normalized Sum of Residual<sup>2</sup> is calculated by dividing each approach's Sum of Residual<sup>2</sup> by the minimum value (i.e., the value from the MVR Transect approach).
